# Supplementary material for: Superoxide dismutases maintain niche homeostasis in stem cell populations
Source: eLife. 2026 Mar 23;13:RP96446. doi: 10.7554/eLife.96446 (PMC13008353; doi:10.7554/eLife.96446)
Supplement: Source data 1. [file elife-96446-data1.xlsx]

## Sheet: Fig 1
	Fig1 Q
	CySC	GSC
	1.65905	1				Fig 1R
		1					Tj-Gal4										SOD1i
	1.31242	1				CySC	2.47795	3.20385	2.24996	1.98452	2.84556	2.54255	3.04485	2.45822	2.65885	3.25455	5.80829	4.62006	6.18595	5.0466	7.77295	6.01541	5.45885	7.24545	6.25455	4.87545
		1				GSC	1.4936	1.88008	1.36662	0.95255	1.63255	1.25455	1.14588	1.35545	1.65854	1.15548	4.28283	2.86517	3.67001	5.42401	4.45484	2.98455	3.01555	4.01554	3.46546	2.24688
	1.35618	1
		1
	1.61249	1
		1
	1.68554	1
		1
	1.93042
	2.41826
	1.5486
	1.42873
	1.65472

## Sheet: Fig 2
Fig 2E			Fig 2F			Fig 2G				Fig 2I
Tj-Gal4	SOD1i		Tj-Gal4	SOD1i		Tj-Gal4	SOD1i				G1								S								G2
43	77		27	38		10	5			Tj-Gal4	44.4444	44	40	48.2759	48.2759				25.9259	20	26.6667	24.1379	20.6897				29.6296	36	33.3333	27.5862	31.0345
50	69		25	44		10	5			SOD1i	39.0244	40.8163	45.8333	39.4737	40.7407				29.2683	22.449	20.8333	28.9474	25.9259				31.7073	36.7347	33.3333	31.5789	33.3333
49	68		29	45		10	7
52	78		34	54		11	5			Fig 2J
50	73		32	44		11	7				G1								S								G2/M
46	83		27	47		10	9			Tj-Gal4	12	11	12	14	14				7	5	8	7	6				8	9	10	8	9
58	78		35	38		11	5			SOD1i	17	20	22	19	22				12	11	10	11	14				13	18	16	12	18
	94		22	32		10	8
	88					11	4
	90					10	5
						11	6
						12
										Fig 2K
										SOD1i	Tj-Gal4
										5	3
										17	5
										10	3
										9	4
										12	10
										14	5
											12
										16	9
										15	4
										7	6
										5	5
											12
										15	3
										14	8

## Sheet: Fig 3
	Fig. 3D						Fig. 3G				Fig. 3H
	Tj-Gal4	SOD1i	Tj-Gal4	SOD1i			Tj-Gal4	SOD1OE				Tj-Gal4										SOD1i
	10	29	2	9			19.4979	21.4623			Round	14.685	12.791	14.747	16.702	17.915	12.577	13.37	12.712	14.656	13.747	12.927	16.872	11.038	14.241	12.377	8.187	19.47	10.277	14.532
	12	19	1	8			17.454	24.3567			Branched	39.335	30.844	38.493	27.29	33.209	38.311	34.674	43.742	30.945	33.49	18.15	23.2	16.774	33.861	28.005	27.903	24.696	24.244	21.958	23.043
	10	21	0	11			18.9745	20.1344
	12	26	3	10			19.5686	20.3279
	13	23	0	14			18.2178	23.4777
	11	24	0	8			20.1546	20.7573			Fig. 3P			Fig. 3Q
	18	27	0	10			22	24.5663			Tj-Gal4	SOD1i		Tj-Gal4	SOD1i
	13	26	1	12							1	0.211		1	0.236
	14	28	1	11							1	0.23		1	0.217
	12	30	0	13							1	0.205		1	0.287
											1	0.231		1	0.312
											1	0.242		1	0.201
											1	0.216		1	0.256

## Sheet: Fig 4
	Fig 4E			Fig 4F				Fig 4I				Fig 4J				Fig 4K							Fig 4L
	Tj-Gal4	SOD1i		Tj-Gal4	SOD1i			Tj-Gal4	SOD1i			Tj-Gal4	Tj-SOD1i			Tj-Gal4	hhi	SOD1i	SOD1i/hhi				Tj-Gal4	hhi only	SOD1i	SOD1i/hhi	PI3KDN
	27.446	19.565		8.9155	4.4975			0.09	3.805			2.796	7.988			11	10	5	9				42	46	72	59	54
	29.152	20.235		9.5615	5.727			0.056	7.176			3.128	8.601			11	9	7	10				51	47	65	61	51
	28.591	20.374		10.291	6.3005			1.211	7.081			3.261	8.711			12	8	6	8				47	44	75	63	47
	25.818	20.505		10.766	6.8985			3.288	7.187			3.23	9.088			10	10	7	9				54	42	81	56	56
	22.385	20.642		11.229	7.8205			3.446	7.16			3.139	9.146			9	9	5	8				55	39	71	58	53
	29.144	20.461		10.9475	8.5025			3.41	7.467			3.168	9.915			10	8	4	8				44	40	84	61	67
	27.007	20.239		9.913	9.039			3.355	7.155			3.309	10.21			11	9	6	9				51	38	74	51	61
	25.83	19.644		9.0275	9.958			3.405	7.315			3.53	10.883			10	10	5	8					35	98	59	63
	23.031	18.133		8.75	10.293			3.598	7.652			3.767	11.839												85		52
	27.697	16.87		8.941	10.2145			3.791	7.881			3.793	11.827												94		65
	30.723	15.883		8.8925	9.4245			4.005	7.595			4.082	11.545
	31.909	14.765		8.46	9.0965			4.042	7.121			3.971	11.278
	34.247	22.716		8.238	9.4025			3.736	6.368			3.902	10.38
	37.396	24.286		8.1705	9.7735			3.168	5.954			3.89	9.169
	34.778	25.924		9.711	10.023			2.929	6.373			3.994	8.512
	32.184	27.528		9.708	9.4695			2.706	4.552			4.357	7.687
	33.373	27.616		10.541	9.027			2.503	5.688			4.403	7.435
	34.647	26.401		10.7995	8.263			2.306	7.065			4.242	5.988
	35.515	25.489		10.832	7.1865			2.145	6.138			4.101	8.856
	54.229	25.857		11.496	6.698			2.062	5.875			3.813	9.005
	54.778	24.757		11.4905	6.6735			2.085	5.492			3.369	9.068
	57.193	23.237		11.2305	6.2125			1.883	5.648			3.203	10.032
	56.843	22.521		10.408	5.4045			1.724	5.628			3.027	10.316
	55.027	21.925		9.7855	4.6005			1.584	5.435			2.578	11.186
	53.2	29.264		9.484	3.9095			1.508	5.354			2.698	11.798
	48.094	33.103		8.3375	4.0565			1.4	5.865			2.983	11.677
	45.077	34.322		7.524	8.2795			1.246	5.985			3.363	11.374
	40.1	37.983		8.3265	7.9055			1.131	6.001			3.664	11.549
	44.983	37.517		11.5605	7.4585			1.039	6.02			4.007	11.458
	46.479	39.185		12.4295	6.3285			0.98	5.496			4.048	10.983
	53.208	37.806		13.5885	6.589			0.983	4.935			4.076	10.227
	58.375	34.687		13.564	6.9655			0.971	4.504			4.01	9.498
	54.75	32.128		12.8545	7.68			0.896	3.995			3.798	8.998
	52.563	31.032		12.958	7.743			0.749	3.791			3.905	8.317
	51.264	29.802		12.6475	7.4605			0.508	4.069			3.823	7.311
	48.717	27.066		12.1255	7.4635			2.392	4.52			3.61	7.059
	45.513	30.812		11.6425	8.2745			2.627	4.624			3.414	5.641
	41.476	33.087		11.4295	9.751			2.644	5.908			3.267	5.65
	40.508	34.567		11.239	10.807			2.899	5.355			3.056	6.15
	37.669	36.305		11.3295	9.951			3.184	5.18			2.901	6.748
	64.048	35.942		11.355	8.3665			3.207	5.597			2.553	6.95
	62.204	36.039		10.907	6.7615			3.037	5.714			2.914	6.792
	65.12	33.787		10.2665	6.2555			2.899	5.895			3.132	6.737
	67.571	32.447		9.723	6.445			2.979	5.653			3.319	6.908
	63.262	32.343		9.4525	6.4735			3.159	5.178			3.732	6.841
	57.746	19.253		8.8815	6.155			3.241	4.875			4.226	7.234
	56.093	18.691		8.1795	5.4745			3.129	4.573			4.549	7.197
	55.957	18.855		9.5035	3.785			3.207	4.671			4.891	6.208
	51.747	17.957		9.717	3.7775			3.181	4.356			4.828	5.986
	49.206	16.682		10.1505	5.7565			3.216	3.477			4.865	5.503
	46.539	15.838		11.013	8.432			3.377	2.894			4.64	4.956
	45.145	14.442		12.4075	9.6835			3.295	2.64			4.585	4.615
	47.457	12.404		12.611	9.6285			3.194	2.601			4.718	4.746
	46.463	10.014		11.8095	8.2955			3.003	6.548			4.479	9.526
	47.277	29.386		11.2595	8.2355			2.846	7.248			4.387	8.339
	45.293	28.345		11.0785	9.245			2.721	4.982			4.087	8.414
	44.201	27.563		10.7255	10.098			2.755	5.848			3.932	8.907
	43.336	26.9		10.3305	10.884			2.709	5.632			3.636	8.987
	41.054	24.982		10.3975	11.1855			2.622	6.056			3.383	8.431
	40.013	23.563		10.496	10.385			2.512	6.096			3.03	8.75
	39.705	21.244		10.101	9.478			2.252	6.466			2.733	8.761
	37.753	18.281		9.8015	9.4475			1.914	6.699			3.238	7.983
	35.887	15.866		9.8675	8.9165			1.663	7.033			3.39	7.027
	32.676	13.259		9.974	8.3535			1.475	6.365			3.67	6.355
	41.182	25.871		9.429	8.0175			1.288	5.786			4.094	5.773
	44.878	26.072		10.923	7.0565			1.136	5.573			4.638	5.244
	46.95	25.43		11.726	10.0575			0.969	5.174			4.732	4.933
	49.322	25.763		11.3515	9.5825			0.825	4.555			5.022	4.59
	51.746	23.913		11.286	9.1145			0.673	4.205			5.006	8.013
	50.31	20.899		12.1195	9.117			0.551	3.992			5.283	8.259
	47.885	17.56		12.866	8.14			0.047	3.967			5.323	8.86
	46.966	15.545		13.0575	7.431			1.086	7.256			5.335	9.238
	45.366	13.171		13.6915	6.741			3.582	5.68			5.147	9.198
	45.559	10.565		13.599	7.081			3.715	4.589			5.085	9.732
				13.281	7.445			3.429	4.223			5.027	9.506
				14.5955	7.1075			3.225	6.314			4.666	9.081
				13.803	6.5345			3.121	5.618			4.552	9.184
				13.1915	6.219			3.304	5.475			4.49	8.88
				12.0985	7.4715			3.618	5.765			4.052	7.834
				10.8955	7.6235			3.803	6			3.49	6.94
				9.6695	7.256			3.759	6.103			2.971	6.507
				8.6325	7.013			3.802	6.325			2.457	5.897
				9.67	6.5525			4.073	6.247			3.165	4.971
				11.4325	6.024			4.233	6.112			3.027	5.297
				12.4685	5.122			4.057	6.041			3.427	4.99
				12.4565	5.1755			3.94	6.502			3.725	5.335
				12.2355	5.9			4.209	6.692			3.88	5.575
				13.186	5.815			4.237	6.098			4.03	6.148
				12.7785	5.332			3.86	5.826			3.974	6.424
				12.7815	5.0565			3.616	5.124			4.116	6.407
				12.93	4.689			3.209	6.982			4.289	6.092
				13.176	4.655			2.776				4.343	5.709
				12.92	4.367			2.553				4.289	5.545
				12.763	6.153			2.523				4.054	5.287
				12.7505	6.3385			2.347				3.842	5.873
				12.3445	6.111			1.333				3.81	6.226
				11.503	6.577			0.312				3.814	7.108
				11.2775	7.049			1.103				4.052	7.482
				11.1045	6.853			4.549				4.367	7.706
				10.5895	6.412			4.575				4.572	8.212
				9.2125	6.4655			3.9				4.4	7.895
				7.523	6.4355			3.926				4.306	7.746
				7.7755	6.282			4.206				4.137	7.373
				7.9765	6.2745			4.356				3.39	6.951
				8.348	6.0565			4.466				3.002	6.496
				9.325	5.958			4.526				2.772	5.925
				11.5155	5.8895			4.725				2.493	5.102
				12.022	6.4235			5.019				2.718	4.961
				10.9365	7.16			5.244				2.96	7.628
				14.401	7.7605			5.144				3.382	8.036
				14.381	7.1355			4.899				3.724	7.861
				14.134	6.4305			4.127				3.668	7.603
				13.2115	5.7225			3.415				3.635	7.511
				12.4095	5.254			3.294				3.668	8.213
				12.021	4.6935			3.211				3.723	8.351
				11.7945	5.0235			2.865				3.794	8.048
				11.094	5.0965			2.453				3.729	8.069
				10.7765	4.942			2.059				3.647	7.936
				10.78	5.0015			1.675				3.501	7.459
				10.4875	4.8225			1.354				3.232	6.791
				10.0485	4.578			1.203				3.059	6.533
				10.969	4.649			1.069				2.681	5.988
				13.0595	11.1615			0.606				2.433	5.164
				15.4235	9.716			0.139				5.137	4.791
				17.765	8.9475			1.615				8.507	5.43
				17.349	9.291			2.958				7.259	5.477
				16.8895	9.943			3.174				7.318	5.441
				18.45	10.196			3.44				7.479	5.492
				19.83	9.266			3.819				7.381	5.734
				20.674	8.549			4.191				7.2	6.141
				19.9175	7.6485			4.39				7.472	6.721
				18.3085	6.6635			4.451				7.448	7.11
				17.8725	6.493			4.647				7.023	7.461
				19.51	6.156			5.028				6.777	7.69
				20.6975	5.666			5.586				6.341	7.458
				18.768	5.054			5.545				5.498	6.798
				18.2165	4.632			4.91				4.952	6.438
				18.399	4.741			4.597				4.583	6.248
				18.448	5.092			4.644				4.058	6.22
				17.538	5.372			4.787				3.785	6.017
				15.5885	5.379			4.636				3.648	5.359
				14.7205	5.305			4.347				3.425	4.828
				14.976	5.1585			4.101				3.129	5.366
				15.1865	12.7885			3.822				2.877	5.338
				14.5905	11.7385			3.572				2.674	5.695
				13.442	10.191			3.241				2.504	6.062
				12.215	10.2075			2.982				3.491	5.903
				11.1595	10.4305			2.749				3.245	5.748
				13.217	10.325			2.559				3.733	6.047
				12.0365	9.4735			2.47				3.925	5.908
				11.7485	8.3065			2.467				4.075	5.704
				12.338	7.9155			2.336				4.261	5.276
				12.0625	7.56			2.078				4.586	4.777
				11.3745	7.113			1.693				4.681	5.053
				10.325	6.921			1.422				4.772	5.842
				9.8555	6.4695			1.219				4.817	6.436
				9.5205	5.768			1.06				4.509	6.784
				9.5815	5.345							4.251	6.942
				9.014	4.8985							3.774	6.867
				8.588	5.2285							3.352	6.793
				8.067	6.0755							3.056	6.89
				9.163	7.3795							2.692	7.037
				12.8735	7.2575							3.221	7.496
				14.008	11.617							4.165	7.229
				13.0535	11.217							3.837	6.534
				11.4385	11.0695							4.098	6.512
				8.973	11.001							4.191	6.164
				11.3935	11.5245							4.08	5.654
				11.1235	11.5055							4.227	5.257
				10.951	10.649							4.363	4.836
				11.5535	9.803							4.224	6.995
				11.542	9.122							4.106	7.153
				10.3015	8.847							4.068	8.067
				18.5665	8.2045							4.031	8.782
				18.258	7.0095							3.933	9.244
				16.758	6.1315							3.549	9.045
				15.681	5.274							3.227	8.881
				14.525	4.488							3.02	8.8
				12.5705	4.123							2.759	8.663
				12.0245	8.188							2.696	8.48
				11.733	8.689							2.46	8.689
				11.7015	8.2395							2.474	8.795
				11.262	8.107							2.658	7.966
				10.9975	8.043							2.961	7.528
				10.477	15.4345							3.055	7.279
				10.294	13.919							2.868	6.647
				10.1265	12.043							2.792	6.141
				9.692	12.111							2.855	5.753
				9.39	11.7285							2.979	5.365
				9.642	11.2785							3.111	5.024
				10.1015	10.572							3.115	3.409
				11.5605	9.4075							3.143	3.427
				12.4295	9.1535							3.353	3.03
				13.5885	9.195							3.451	3.135
				13.564	9.258							3.396	2.989
				12.8545	9.4505							3.346	3.129
				12.958	9.74							3.295	3.177
				12.6475	10.31							3.405	3.309
				12.1255	9.853							3.463	3.616
				11.448	9.36							3.368	3.77
				13.538	5.5265							3.201	3.542
				15.5885	7.723							3.047	3.403
				9.5205	6.2635							2.753	3.082
				9.5815	5.38							2.554

## Sheet: Fig 5
	Fig 5A				Fig 5B				Fig 5E				Fig 5F
	Tj-Gal4	SOD1OE			Tj-Gal4	SOD1OE			Tj-Gal4	SOD1OE			Tj-Gal4	SOD1OE
	9	14			42	39			26	33			19.4979	21.4623
	10	13			49	44			20	35			17.454	24.3567
	10	14			53	49			25	29			18.9745	20.1344
	11	12			45	43			22	27			19.5686	20.3279
	11	14			41	46			25	30			18.2178	23.4777
	10	12			46	37			24	34			20.1546	20.7573
	9	13			44	41							22	24.5663
	10	12			53	41
	11	14			52	45
	11	12			51	42
